# Supplementary material for: Developmentally arrested Austrofundulus limnaeus embryos have changes in post-translational modifications of histone H3
Source: Oxford University Press journal article supplement (doi:10.1242/jeb.131862), 2015-01-01
Supplement: jeb131862supp.pdf [file jeb131862supp.pdf]

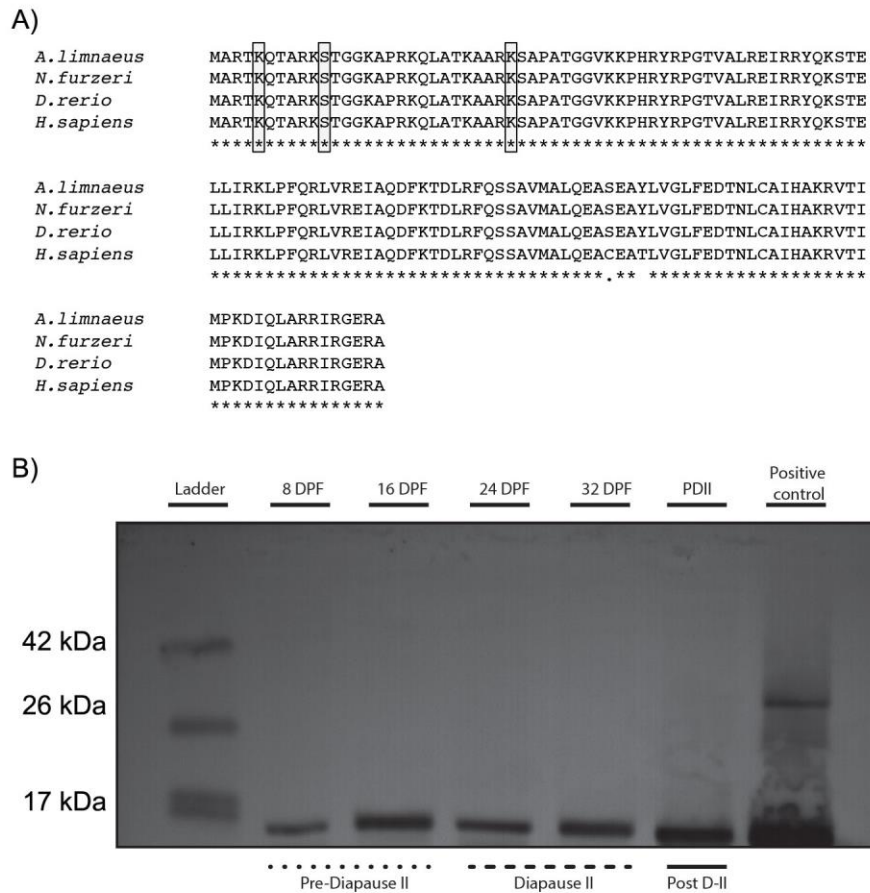

**Fig. S1.** A) Alignment of histone H3 in the specified species. BLAST analysis was used to identify the known or predicted histone H3 primary sequence in the three fish using the human histone H3 primary sequence. Clustal W was used to align the primary sequences. Grey box outlines the amino acids that are subject to modification and that we assay in our studies. B) Western blot analysis of purified histones probed with anti-histone H3. Positive control is recombinant form of histone H3 (15.2 kDa).

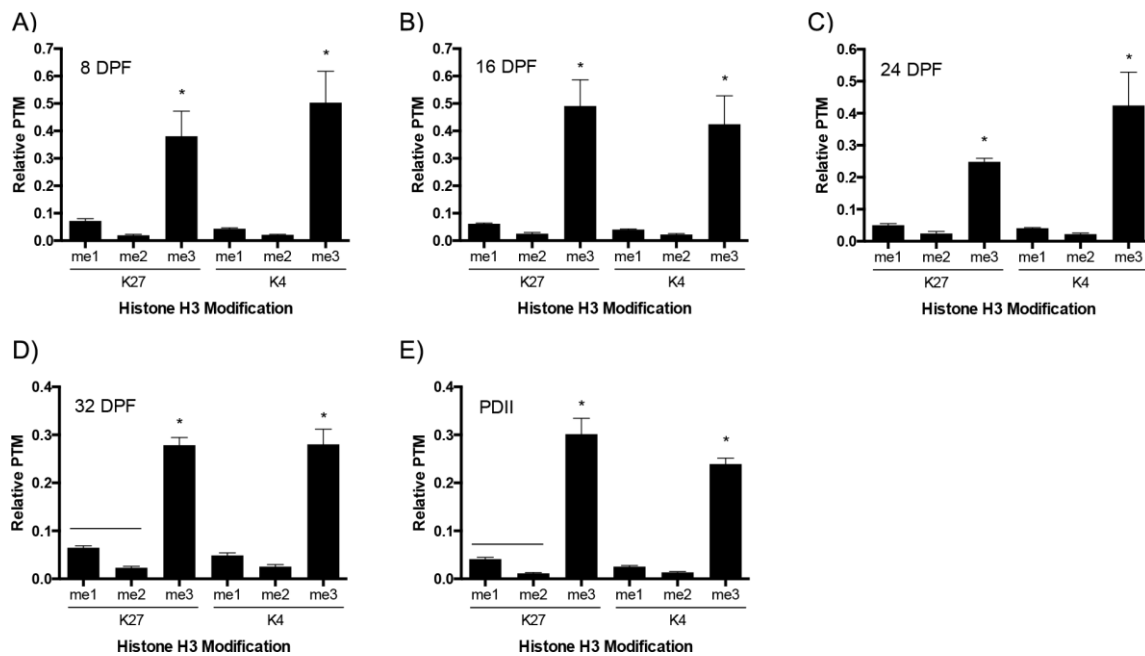

**Fig. S2.** The post-translational methylation of H3K27 or H3K4 relative to histone H3, was determined in A) preDII (8 dpf), B) preDII (16 dpf), C) DII (24 dpf), D) DII (32 dpf) and E) postDII embryos. ELISA was used to quantify the monomethylation (me1), dimethylation (me2) and trimethylation (me3) methylation for H3K27 or H3K4. The \* indicates a significant difference between the me3 and me2/me1 PTM ( $p < 0.005$ ). The line indicates a significant difference between the me1 and me2 PTM ( $p < .005$ ). The p values were determined using one-way ANOVA followed by a Holm-Sidak's multiple comparison test. The values are mean  $\pm$  s.e.m. The data is obtained from 80-100 embryos per trial ( $n=3$ ) for each embryo stage.

| <b>Table S1. Statistical Data for ELISA experiments</b> |                |                         |
|---------------------------------------------------------|----------------|-------------------------|
| <b>Holm-Sidak's multiple comparisons test</b>           | <b>Summary</b> | <b>Adjusted P Value</b> |
| <b>H3K27me1 (Figure 5A)</b>                             |                |                         |
| 8 DPF vs. 16 DPF                                        | ns             | 0.591                   |
| 8 DPF vs. 24 DPF                                        | *              | 0.0434                  |
| 8 DPF vs. 32 DPF                                        | ns             | 0.7151                  |
| 8 DPF vs. PDII                                          | **             | 0.0015                  |
| 16 DPF vs. 24 DPF                                       | ns             | 0.3778                  |
| 16 DPF vs. 32 DPF                                       | ns             | 0.7151                  |
| 16 DPF vs. PDII                                         | *              | 0.032                   |
| 24 DPF vs. 32 DPF                                       | ns             | 0.2069                  |
| 24 DPF vs. PDII                                         | ns             | 0.5825                  |
| 32 DPF vs. PDII                                         | *              | 0.0116                  |
| <b>H3K27me2 (Figure 5B)</b>                             |                |                         |
| 8 DPF vs. 16 DPF                                        | ns             | 0.8916                  |
| 8 DPF vs. 24 DPF                                        | ns             | 0.9318                  |
| 8 DPF vs. 32 DPF                                        | ns             | 0.8916                  |
| 8 DPF vs. PDII                                          | ns             | 0.8149                  |
| 16 DPF vs. 24 DPF                                       | ns             | 0.9829                  |
| 16 DPF vs. 32 DPF                                       | ns             | 0.9829                  |
| 16 DPF vs. PDII                                         | ns             | 0.2415                  |
| 24 DPF vs. 32 DPF                                       | ns             | 0.9829                  |
| 24 DPF vs. PDII                                         | ns             | 0.3742                  |
| 32 DPF vs. PDII                                         | ns             | 0.2669                  |
| <b>H3K27me3 (Figure 5C)</b>                             |                |                         |
| 8 DPF vs. 16 DPF                                        | ns             | 0.7337                  |
| 8 DPF vs. 24 DPF                                        | ns             | 0.7337                  |
| 8 DPF vs. 32 DPF                                        | ns             | 0.8379                  |
| 8 DPF vs. PDII                                          | ns             | 0.8813                  |
| 16 DPF vs. 24 DPF                                       | *              | 0.0361                  |
| 16 DPF vs. 32 DPF                                       | ns             | 0.0879                  |
| 16 DPF vs. PDII                                         | ns             | 0.1365                  |
| 24 DPF vs. 32 DPF                                       | ns             | 0.9078                  |
| 24 DPF vs. PDII                                         | ns             | 0.8976                  |
| 32 DPF vs. PDII                                         | ns             | 0.9078                  |

The p values were determined using one-way ANOVA with Holm-Sidak's multiple comparison post-test.

N=3 trials per DPF (80-100 embryos/trial).

| <b>Table S2. Statistical Data for ELISA experiments</b> |                |                         |
|---------------------------------------------------------|----------------|-------------------------|
| <b>Holm-Sidak's multiple comparisons test</b>           | <b>Summary</b> | <b>Adjusted P Value</b> |
| <b>H3K4me1 (Figure 5D)</b>                              |                |                         |
| 8 DPF vs. 16 DPF                                        | ns             | 0.9701                  |
| 8 DPF vs. 24 DPF                                        | ns             | 0.9701                  |
| 8 DPF vs. 32 DPF                                        | ns             | 0.7938                  |
| 8 DPF vs. PDII                                          | **             | 0.0038                  |
| 16 DPF vs. 24 DPF                                       | ns             | 0.9701                  |
| 16 DPF vs. 32 DPF                                       | ns             | 0.6737                  |
| 16 DPF vs. PDII                                         | **             | 0.0094                  |
| 24 DPF vs. 32 DPF                                       | ns             | 0.7903                  |
| 24 DPF vs. PDII                                         | **             | 0.0049                  |
| 32 DPF vs. PDII                                         | ***            | 0.0002                  |
| <b>H3K4me2 (Figure 5E)</b>                              |                |                         |
| 8 DPF vs. 16 DPF                                        | ns             | 0.9901                  |
| 8 DPF vs. 24 DPF                                        | ns             | 0.9901                  |
| 8 DPF vs. 32 DPF                                        | ns             | 0.974                   |
| 8 DPF vs. PDII                                          | ns             | 0.2228                  |
| 16 DPF vs. 24 DPF                                       | ns             | 0.9901                  |
| 16 DPF vs. 32 DPF                                       | ns             | 0.974                   |
| 16 DPF vs. PDII                                         | ns             | 0.2228                  |
| 24 DPF vs. 32 DPF                                       | ns             | 0.9822                  |
| 24 DPF vs. PDII                                         | ns             | 0.1508                  |
| 32 DPF vs. PDII                                         | ns             | 0.0522                  |
| <b>H3K4me3 (Figure 5F)</b>                              |                |                         |
| 8 DPF vs. 16 DPF                                        | ns             | 0.8637                  |
| 8 DPF vs. 24 DPF                                        | *              | 0.0496                  |
| 8 DPF vs. 32 DPF                                        | ns             | 0.2535                  |
| 8 DPF vs. PDII                                          | ns             | 0.131                   |
| 16 DPF vs. 24 DPF                                       | ns             | 0.2595                  |
| 16 DPF vs. 32 DPF                                       | ns             | 0.6697                  |
| 16 DPF vs. PDII                                         | ns             | 0.482                   |
| 24 DPF vs. 32 DPF                                       | ns             | 0.8637                  |
| 24 DPF vs. PDII                                         | ns             | 0.8877                  |
| 32 DPF vs. PDII                                         | ns             | 0.8877                  |

The p values were determined using one-way ANOVA with Holm-Sidak's multiple comparison post-test.

N=3 trials per DPF (80-100 embryos/trial).

| <b>Table S3. Statistical Data for ELISA experiments</b> |                |                         |
|---------------------------------------------------------|----------------|-------------------------|
| <b>Holm-Sidak's multiple comparisons test</b>           | <b>Summary</b> | <b>Adjusted P Value</b> |
| <b>HSP70 (Figure 6A)</b>                                |                |                         |
| 8 DPF vs. 16 DPF                                        | ns             | 0.8116                  |
| 8 DPF vs. 24 DPF                                        | ns             | 0.7727                  |
| 8 DPF vs. 32 DPF                                        | ns             | 0.7804                  |
| 8 DPF vs. PDII                                          | ****           | < 0.0001                |
| 16 DPF vs. 24 DPF                                       | ns             | 0.6695                  |
| 16 DPF vs. 32 DPF                                       | ns             | 0.8116                  |
| 16 DPF vs. PDII                                         | ****           | < 0.0001                |
| 24 DPF vs. 32 DPF                                       | ns             | 0.3386                  |
| 24 DPF vs. PDII                                         | ****           | < 0.0001                |
| 32 DPF vs. PDII                                         | ****           | < 0.0001                |
| <b>RNA Pol II S5P (Figure 6B)</b>                       |                |                         |
| 8 DPF vs. 16 DPF                                        | ns             | 0.9144                  |
| 8 DPF vs. 24 DPF                                        | ns             | 0.5962                  |
| 8 DPF vs. 32 DPF                                        | ns             | 0.9809                  |
| 8 DPF vs. PDII                                          | ns             | 0.9809                  |
| 16 DPF vs. 24 DPF                                       | ns             | 0.9144                  |
| 16 DPF vs. 32 DPF                                       | ns             | 0.8891                  |
| 16 DPF vs. PDII                                         | ns             | 0.8891                  |
| 24 DPF vs. 32 DPF                                       | ns             | 0.4215                  |
| 24 DPF vs. PDII                                         | ns             | 0.4215                  |
| 32 DPF vs. PDII                                         | ns             | 0.9971                  |

The p values were determined using one-way ANOVA with Holm-Sidak's multiple comparison post-test.

N=3 trials per DPF (80-100 embryos/trial).
